# Supplementary material for: Urinary expression of let-7c cluster as non-invasive tool to assess the risk of disease progression in patients with high grade non-muscle invasive bladder Cancer: a pilot study
Source: PubMed Central journal article supplement (PMC7164295; doi:10.1186/s13046-020-01550-w), 2020-04-17

**A***Tissue*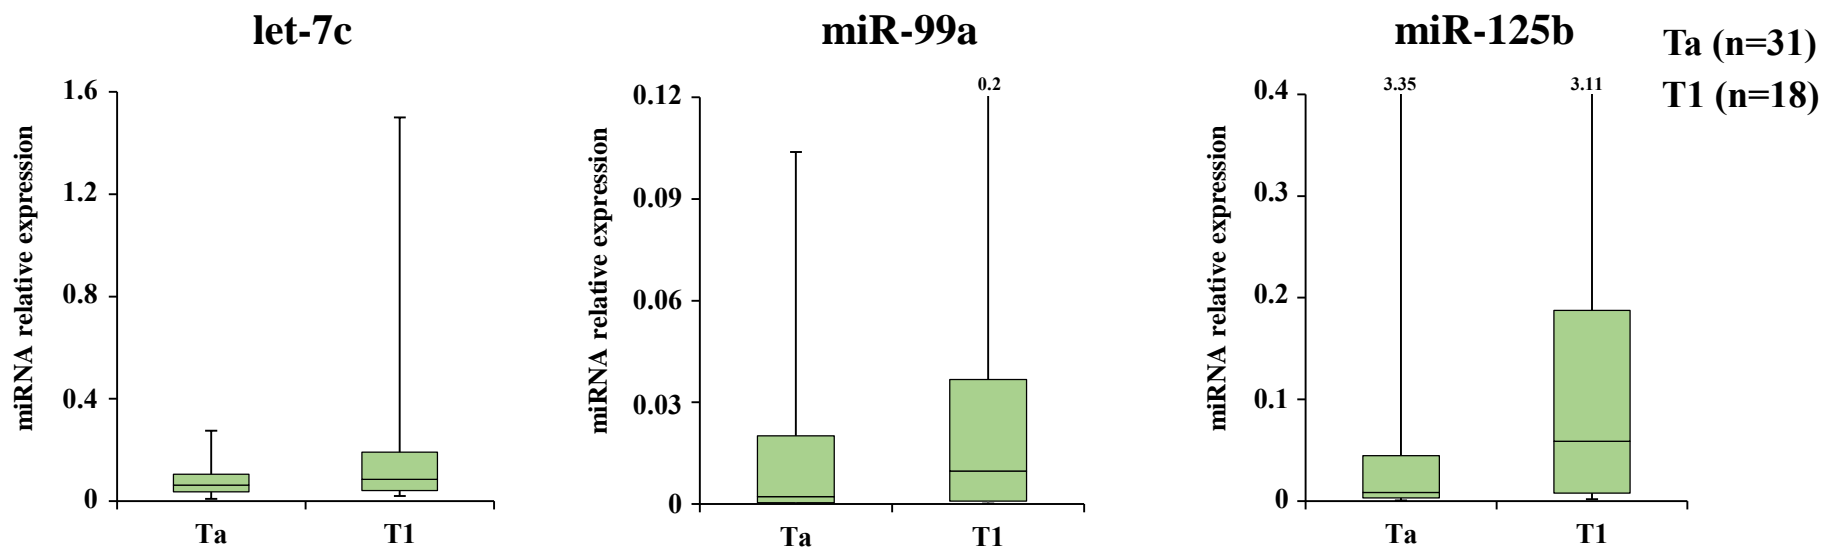**B**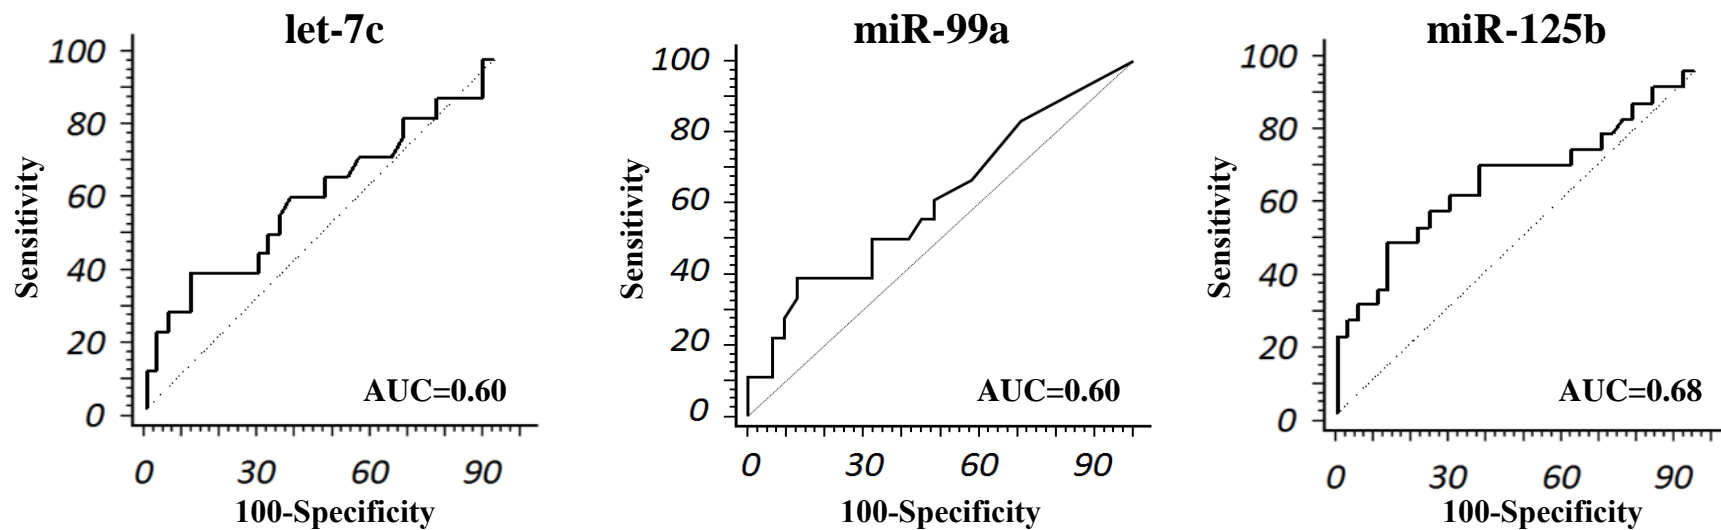

Supplement: 13046_2020_1550_MOESM1_ESM.pdf [file 13046_2020_1550_MOESM1_ESM.pdf]
